# Supplementary material for: Nature-Derived Cellulose-Based Composite Separator for Sodium-Ion Batteries
Source: PubMed Central journal article supplement (PMC7076124; doi:10.3389/fchem.2020.00153), 2020-03-10
Supplement: Data_Sheet_1.pdf [file Data_Sheet_1.pdf]

*Supplementary Material*

# **Nature-derived Cellulose-based Composite Separator for Sodium-ion Batteries**

Jae Hyeon Jo<sup>1,z</sup>, Chang-Heum Jo<sup>1,z</sup>, Zhengfu Qiu<sup>2</sup>, Hitoshi Yashiro<sup>3</sup>, Liyi Shi<sup>2</sup>, Zhuyi Wang<sup>2</sup>, Shuai Yuan<sup>2\*</sup> and Seung-Taek Myung<sup>1\*</sup>

<sup>1</sup>*Department of Nanotechnology and Advanced Materials Engineering & Sejong Battery Institute, Sejong University, Seoul, 05006 South Korea*

<sup>2</sup>*Research Centre of Nanoscience and Nanotechnology, Shanghai University, Shanghai 200444, China*

<sup>3</sup>*Department of Chemistry and Bioengineering, Iwate University, Ueda 4-3-5, Morioka, Iwate 020-8551, Japan*

**\* Correspondence:**

Shuai Yuan  
s.yuan@shu.edu.cn  
Seung-Taek Myung  
smyung@sejong.ac.kr

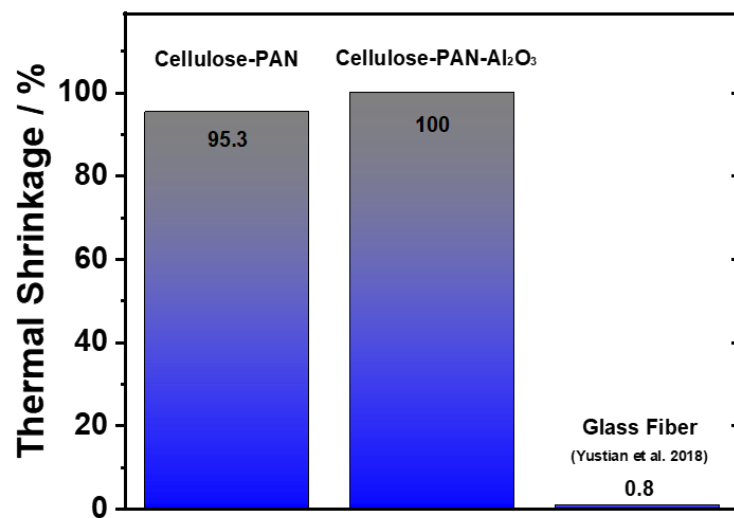

**Supplementary Figure 1.** Thermal shrinkage rate for Cellulose-PAN, Cellulose-PAN-Al<sub>2</sub>O<sub>3</sub> and Glass Fiber (300 °C for 0.5h)

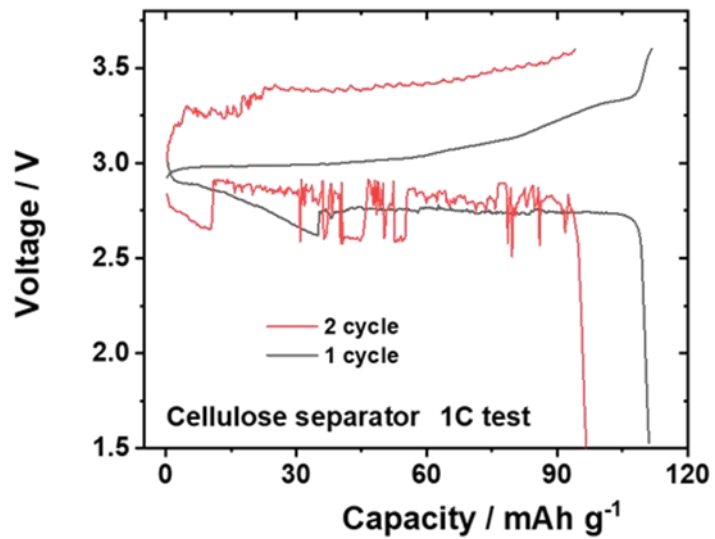

**Supplementary Figure 2.** Initial charge and discharge curves of C-NaCrO<sub>2</sub> cell using cellulose separator.

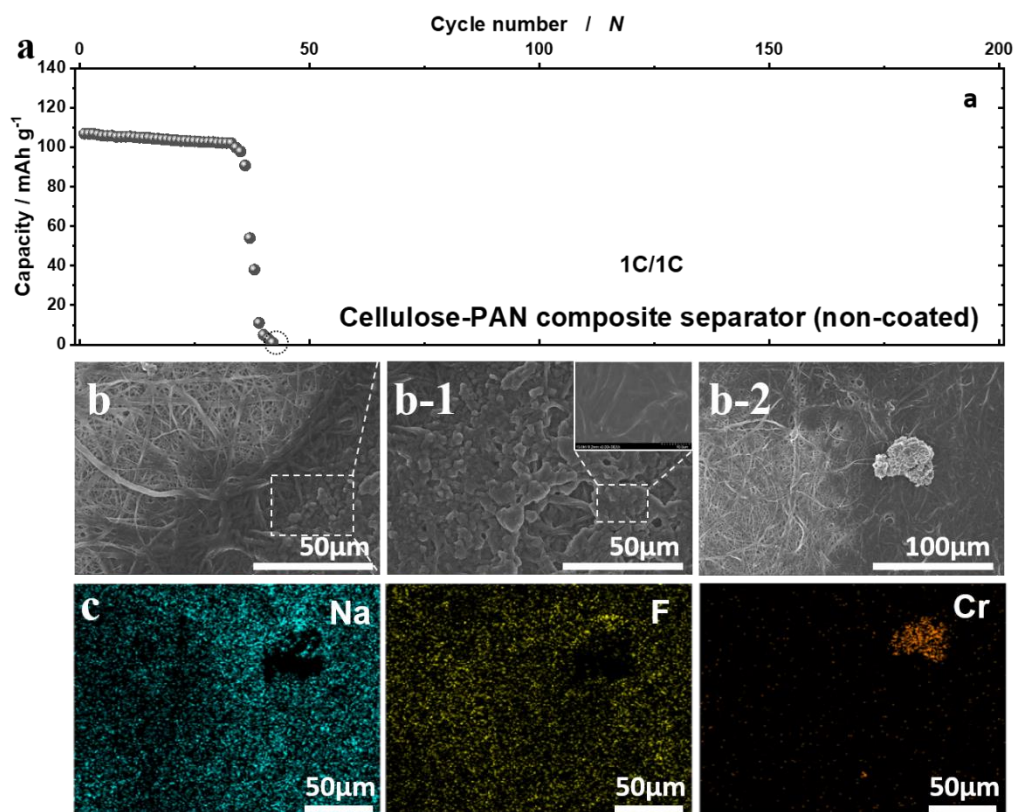

**Supplementary Figure 3.** (a) Cycling performance of C- $\text{NaCrO}_2$  using uncoated cellulose-PAN composite separator. (b) SEM images of surface of cycled uncoated cellulose-PAN composite separator and (c) EDX mapping images for (b-2).

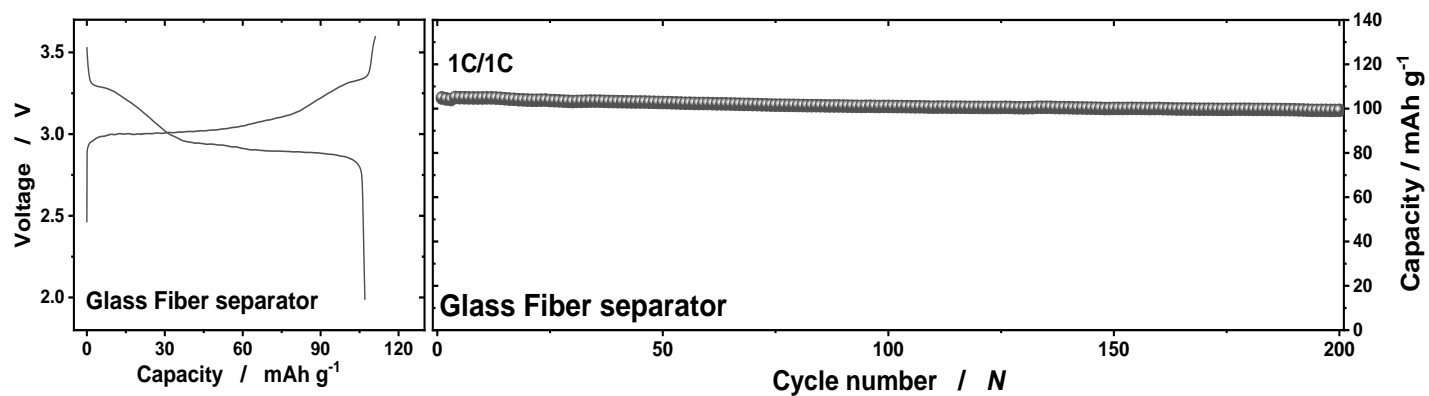

**Supplementary Figure 4.** (a) charge and discharge curves of C-NaCrO<sub>2</sub>/Na cells using glass fiber separator; (b) cycling performance at rates of 1C.
